# Supplementary material for: Comparison of different coagulants to improve membrane distillation performance for landfill leachate concentrate treatment
Source: Royal Society of Chemistry journal article supplement (doi:10.1039/d3ew00532a), 2023-01-01
Supplement: d3ew00532a1.pdf [file d3ew00532a1.pdf]

**Comparison of different coagulants to improve membrane  
distillation performance for landfill leachate concentrate treatment**

**Supplementary Data**

Revised manuscript to *Environmental Science: Water Research & Technology*

September 2023

Ruohan Xia<sup>a</sup>, Wancen Liu<sup>a</sup>, Dingge Cao<sup>a</sup>, Ning Wang<sup>a</sup>, Guoxue Li<sup>a</sup>, Long D.

Nghiem<sup>c</sup>, Wenhai Luo<sup>a,b\*</sup>

<sup>a</sup> *Beijing Key Laboratory of Farmland Soil Pollution Prevention and Remediation,  
College of Resources and Environmental Sciences, China Agricultural University,  
Beijing, 100193, China*

<sup>b</sup> *Organic Recycling Institute (Suzhou) of China Agricultural University, Wuzhong  
District, 215128 Jiangsu Province, China*

<sup>c</sup> *Centre for Technology in Water and Wastewater, School of Civil and Environmental  
Engineering, University of Technology Sydney, Ultimo, NSW 2007, Australia*

---

\* Corresponding author: [luowenhai@cau.edu.cn](mailto:luowenhai@cau.edu.cn); Ph: +86 18311430503.

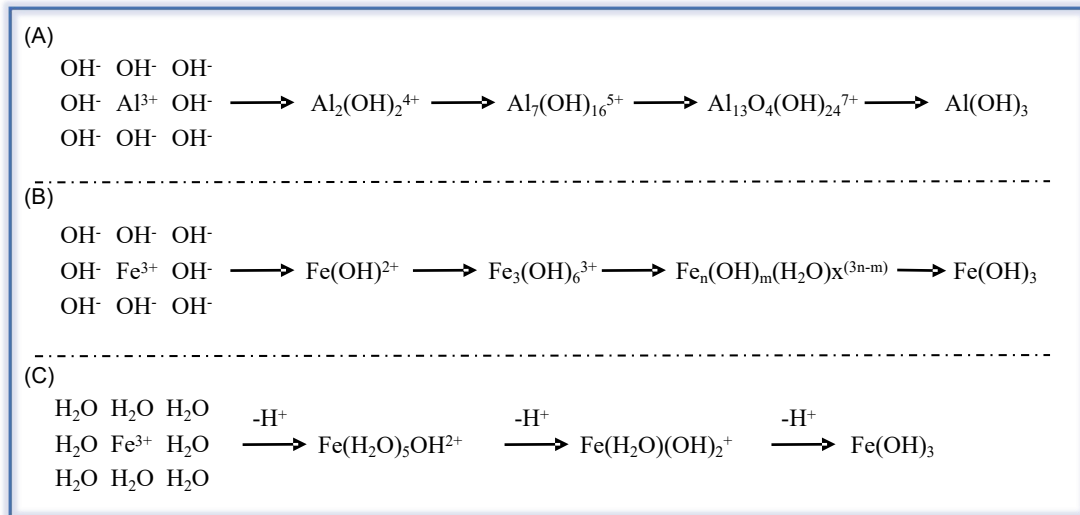

**Fig. S1:** Hydrolysis of PAC (A), PFS (B) and FeCl<sub>3</sub> (C).

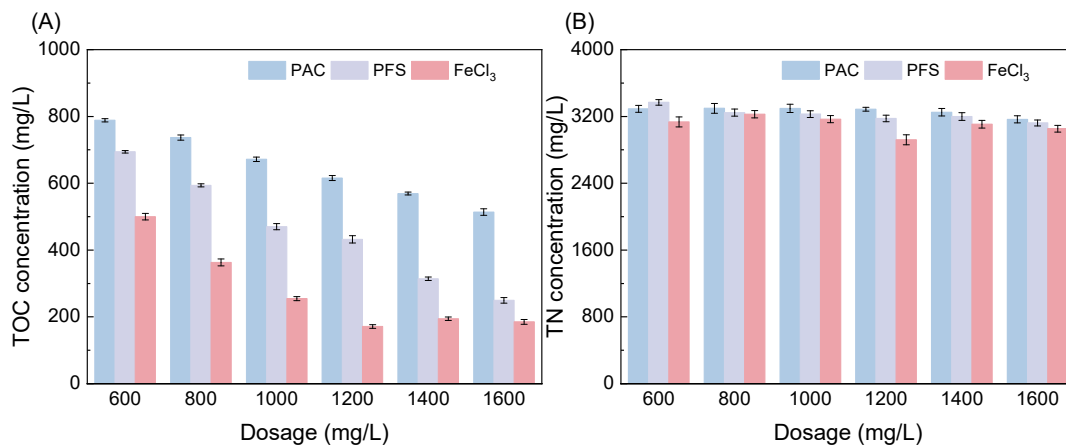

**Fig. S2:** Effect of coagulation on the concentration of TOC (A) and TN (B) in landfill leachate concentrate. Three coagulants, including PAC, PFS and FeCl<sub>3</sub>, were added to leachate concentrate and then mixed rapidly at 250 r/min for 2 min, slowly at 60 r/min for 10 min before natural settlement for approximately 30 min under the room temperature.

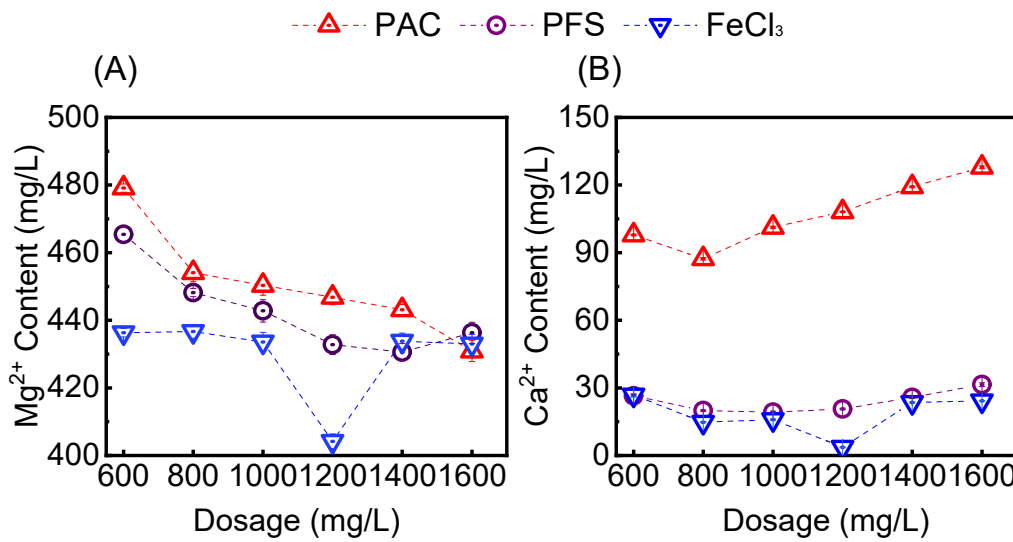

**Fig. S3:** Removal of  $Mg^{2+}$  and  $Ca^{2+}$  from landfill leachate concentrate via coagulation at different dosages. Experimental conditions were shown in the caption of Fig. S2.

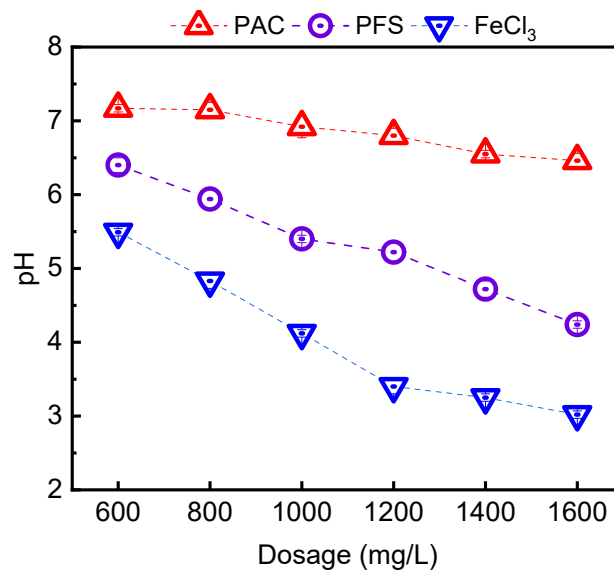

**Fig. S4:** Effect of coagulation on the pH of landfill leachate concentrate. Experimental conditions were shown in the caption of Fig. S2.

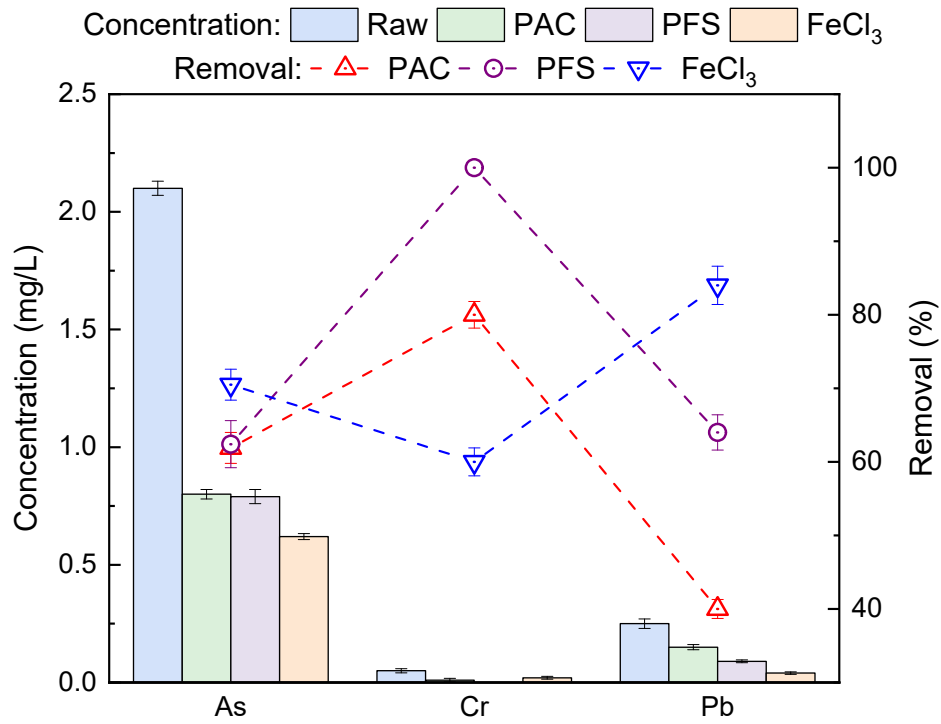

**Fig. S5:** Effect of coagulation on the removal of heavy metals in landfill leachate concentrate by coagulation and their concentration at 1200 mg/L. Experimental conditions were shown in the caption of Fig. S2.

**Table S1:** Elements onto the pristine and fouled membrane after MD operation for landfill leachate concentrate treatment via EDS measurement

| Element/<br>Wt (%) | Pristine | Raw  | PAC  | PFS  | FeCl <sub>3</sub> |
|--------------------|----------|------|------|------|-------------------|
| F                  | 70.1     | 0.6  | 35.9 |      | 65.7              |
| C                  | 29.9     | 6.1  | 24.3 |      | 27.2              |
| O                  |          | 31.1 | 15.5 | 38.6 | 4.5               |
| Na                 |          | 17.4 | 5.8  | 18.1 | 1.3               |
| Cl                 |          | 20.5 | 5.4  | 16.1 | 0.6               |
| N                  |          | 11.8 | 4.2  |      |                   |
| K                  |          | 10.7 | 2.8  | 10.9 | 0.5               |
| Ca                 |          | 1.1  | 0.9  |      |                   |
| Mg                 |          | 0.7  | 0.7  | 2.0  | 0.3               |
| Si                 |          |      | 3.6  | 1.0  |                   |
| S                  |          |      | 0.2  | 1.3  |                   |
| Fe                 |          |      |      | 5.1  |                   |
| Al                 |          |      | 0.5  |      |                   |
